# Supplementary material
Source: publisher figshare collection journal article supplement (https://aacr.figshare.com/articles/dataset/_/23684062)
Supplement: Supplementary file 1 [file 41561395]

## Supplementary Data

### An investigation of PARP inhibitor resistance through the analysis of serially collected circulating tumor DNA in patients with *BRCA*-mutated ovarian cancer

Yoo-Na Kim\*, Yeeun Shim\*, Jieun Seo, Zisun Choi, Yong Jae Lee, Saeam Shin, Sang Wun Kim, Sunghoon Kim, Jong Rak Choi, Jung-Yun Lee†, Seung-Tae Lee†

\*contributed equally

†Co-corresponding author. Email: [jungyunlee@yuhs.ac](mailto:jungyunlee@yuhs.ac); [lee.st@yuhs.ac](mailto:lee.st@yuhs.ac)

## Table of Contents

### Supplementary Methods

Gene list for each resistance mechanism .....2

### Supplementary Figures

Fig. S1. Analysis of ctDNA in matched samples. ....4

Fig. S2. *BRCA* reversion mutation identified in 3 patients .....5

Fig. S3. Post-specific mutations in *ATM*, *CHEK2*, and *TP53* in pre-PARPi and post-PARPi ctDNA samples.....6

Fig. S4. Copy number alteration based on ctDNA.....7

Fig. S5. Response to subsequent platinum-based therapy for each resistance mechanism .....8

### Supplementary Tables

Table S1. Demographics.....9

Table S2. Post-specific resistance mechanisms, including genes assessed and the proportion of patients with post-specific alterations .....10

## Supplementary Methods

| Resistance mechanisms                | Genes                                                                                                                                                                                                                                                                                                                                                                                                                                                                                                                                                      |
|--------------------------------------|------------------------------------------------------------------------------------------------------------------------------------------------------------------------------------------------------------------------------------------------------------------------------------------------------------------------------------------------------------------------------------------------------------------------------------------------------------------------------------------------------------------------------------------------------------|
| BRCA independent HR restoration      | <i>TP53BP1</i> <sup>1</sup> , <i>C11orf30</i> ( <i>EMSY</i> ) <sup>2</sup> , <i>KMT2C</i> <sup>3,4</sup> , <i>KMT2A</i> <sup>5,6</sup> , <i>SLX4</i> <sup>7</sup> , <i>CTCF</i> <sup>8-10</sup> , <i>SMC3</i> <sup>11</sup>                                                                                                                                                                                                                                                                                                                                |
| Replication fork stabilization       | <i>SUZ12</i> <sup>12</sup> , <i>MRE11</i> <sup>13</sup> , <i>BLM</i> <sup>14</sup> , <i>CHD4</i> <sup>15,16</sup> , <i>ZFHX3</i> <sup>17</sup> , <i>TET2</i> <sup>18</sup> , <i>MED12</i> <sup>19</sup> , <i>MUC1</i> <sup>20</sup> , <i>SMARCA4</i> <sup>21</sup> , <i>EPHA7</i> <sup>22</sup> , <i>ATRX</i> <sup>23,24</sup> , <i>WRN</i> <sup>25</sup>                                                                                                                                                                                                  |
| Upregulation of pro-survival pathway | - <i>PI3K-AKT-mTOR</i> : <i>PIK3CA</i> , <i>PIK3CB</i> , <i>PIK3C2B</i> , <i>PIK3C2G</i> , <i>PIK3CD</i> , <i>PIK3R1</i> <sup>26</sup> , <i>MTOR</i> <sup>27</sup> , <i>RXRA</i> <sup>28</sup> , <i>SETD2</i> <sup>29-31</sup> , <i>PTPRS</i> <sup>32</sup><br>- <i>WNT</i> : <i>IRF2</i> <sup>33</sup> , <i>AXINI</i> <sup>34</sup> , <i>TCF7L2</i> <sup>35</sup> , <i>AMER1</i> , <i>PDGFRB</i> <sup>36</sup> , <i>PDGFRA</i> <sup>37</sup><br>- <i>Oncogene</i> : <i>KRAS</i> <sup>38,39</sup> , <i>RET</i> , <i>MET</i> , <i>BRD4</i> <sup>40,41</sup> |
| Loss of target                       | <i>PARP1</i>                                                                                                                                                                                                                                                                                                                                                                                                                                                                                                                                               |
| Increased drug efflux                | <i>CYP1B1</i> <sup>42</sup> , <i>NUP93</i> <sup>43</sup> , <i>TAP2</i> <sup>44</sup> , <i>PTCH1</i> <sup>45</sup>                                                                                                                                                                                                                                                                                                                                                                                                                                          |

- Bunting SF, Callen E, Wong N, et al: 53BP1 inhibits homologous recombination in Brca1-deficient cells by blocking resection of DNA breaks. *Cell* 141:243-54, 2010
- Jiang X, Li X, Li W, et al: PARP inhibitors in ovarian cancer: Sensitivity prediction and resistance mechanisms. *J Cell Mol Med* 23:2303-2313, 2019
- Chang A, Liu L, Ashby JM, et al: Recruitment of KMT2C/MLL3 to DNA Damage Sites Mediates DNA Damage Responses and Regulates PARP Inhibitor Sensitivity in Cancer. *Cancer Res* 81:3358-3373, 2021
- Rampias T, Karagiannis D, Avgeris M, et al: The lysine-specific methyltransferase KMT2C/MLL3 regulates DNA repair components in cancer. *EMBO Rep* 20, 2019
- Dellomo AJ, Baer MR, Rassool FV: Partnering with PARP inhibitors in acute myeloid leukemia with FLT3-ITD. *Cancer Lett* 454:171-178, 2019
- Padella A, Ghelli Luserna Di Rora A, Marconi G, et al: Targeting PARP proteins in acute leukemia: DNA damage response inhibition and therapeutic strategies. *J Hematol Oncol* 15:10, 2022
- Kim Y, Spitz GS, Veturi U, et al: Regulation of multiple DNA repair pathways by the Fanconi anemia protein SLX4. *Blood* 121:54-63, 2013
- Farrar D, Rai S, Chernukhin I, et al: Mutational analysis of the poly(ADP-ribosylation) sites of the transcription factor CTCF provides an insight into the mechanism of its regulation by poly(ADP-ribosylation). *Mol Cell Biol* 30:1199-216, 2010
- Hilmi K, Jangal M, Marques M, et al: CTCF facilitates DNA double-strand break repair by enhancing homologous recombination repair. *Sci Adv* 3:e1601898, 2017
- Hwang SY, Kang MA, Baik CJ, et al: CTCF cooperates with CtIP to drive homologous recombination repair of double-strand breaks. *Nucleic Acids Res* 47:9160-9179, 2019
- Slade D: PARP and PARG inhibitors in cancer treatment. *Genes Dev* 34:360-394, 2020
- Yamaguchi H, Du Y, Nakai K, et al: EZH2 contributes to the response to PARP inhibitors through its PARP-mediated poly-ADP ribosylation in breast cancer. *Oncogene* 37:208-217, 2018
- Janysek DC, Kim J, Duijf PHG, et al: Clinical use and mechanisms of resistance for PARP inhibitors in homologous recombination-deficient cancers. *Transl Oncol* 14:101012, 2021
- Asim M, Tarish F, Zecchini HI, et al: Synthetic lethality between androgen receptor signalling and the PARP pathway in prostate cancer. *Nat Commun* 8:374, 2017
- Guillemette S, Serra RW, Peng M, et al: Resistance to therapy in BRCA2 mutant cells due to loss of the nucleosome remodeling factor CHD4. *Genes Dev* 29:489-94, 2015
- McKenzie LD, LeClair JW, Miller KN, et al: CHD4 regulates the DNA damage response and RAD51 expression in glioblastoma. *Sci Rep* 9:4444, 2019
- Panzarino NJ, Krais JJ, Cong K, et al: Replication Gaps Underlie BRCA Deficiency and Therapy Response. *Cancer Res* 81:1388-1397, 2021
- Kharat SS, Ding X, Swaminathan D, et al: Degradation of 5hmC-marked stalled replication forks by APE1 causes genomic instability. *Sci Signal* 13, 2020

19. Jackson LM, Dhoonmoon A, Hale A, et al: Loss of MED12 activates the TGFbeta pathway to promote chemoresistance and replication fork stability in BRCA-deficient cells. *Nucleic Acids Res* 49:12855-12869, 2021
20. Yamamoto M, Jin C, Hata T, et al: MUC1-C Integrates Chromatin Remodeling and PARP1 Activity in the DNA Damage Response of Triple-Negative Breast Cancer Cells. *Cancer Res* 79:2031-2041, 2019
21. Leitner K, Tsibulak I, Wieser V, et al: Clinical impact of EZH2 and its antagonist SMARCA4 in ovarian cancer. *Sci Rep* 10:20412, 2020
22. Di W, Weinan X, Xin L, et al: Long noncoding RNA SNHG14 facilitates colorectal cancer metastasis through targeting EZH2-regulated EPHA7. *Cell Death Dis* 10:514, 2019
23. Garbarino J, Eckroate J, Sundaram RK, et al: Loss of ATRX confers DNA repair defects and PARP inhibitor sensitivity. *Transl Oncol* 14:101147, 2021
24. Han B, Meng X, Wu P, et al: ATRX/EZH2 complex epigenetically regulates FADD/PARP1 axis, contributing to TMZ resistance in glioma. *Theranostics* 10:3351-3365, 2020
25. Datta A, Biswas K, Sommers JA, et al: WRN helicase safeguards deprotected replication forks in BRCA2-mutated cancer cells. *Nat Commun* 12:6561, 2021
26. Chen L, Yang L, Yao L, et al: Characterization of PIK3CA and PIK3R1 somatic mutations in Chinese breast cancer patients. *Nat Commun* 9:1357, 2018
27. Cardnell RJ, Feng Y, Mukherjee S, et al: Activation of the PI3K/mTOR Pathway following PARP Inhibition in Small Cell Lung Cancer. *PLoS One* 11:e0152584, 2016
28. Zhang R, Li H, Zhang S, et al: RXRalpha provokes tumor suppression through p53/p21/p16 and PI3K-AKT signaling pathways during stem cell differentiation and in cancer cells. *Cell Death Dis* 9:532, 2018
29. Ding H, Zhao J, Zhang Y, et al: Systematic Analysis of Drug Vulnerabilities Conferred by Tumor Suppressor Loss. *Cell Rep* 27:3331-3344 e6, 2019
30. Mar BG, Chu SH, Kahn JD, et al: SETD2 alterations impair DNA damage recognition and lead to resistance to chemotherapy in leukemia. *Blood* 130:2631-2641, 2017
31. Yang H, Cui W, Wang L: Epigenetic synthetic lethality approaches in cancer therapy. *Clin Epigenetics* 11:136, 2019
32. Morris LG, Taylor BS, Bivona TG, et al: Genomic dissection of the epidermal growth factor receptor (EGFR)/PI3K pathway reveals frequent deletion of the EGFR phosphatase PTPRS in head and neck cancers. *Proc Natl Acad Sci U S A* 108:19024-9, 2011
33. Guo Y, Xu J, Du Q, et al: IRF2 regulates cellular survival and Lenvatinib-sensitivity of hepatocellular carcinoma (HCC) through regulating beta-catenin. *Transl Oncol* 14:101059, 2021
34. Yu F, Yu C, Li F, et al: Wnt/beta-catenin signaling in cancers and targeted therapies. *Signal Transduct Target Ther* 6:307, 2021
35. Shen G, Gao Q, Liu F, et al: The Wnt3a/beta-catenin/TCF7L2 signaling axis reduces the sensitivity of HER2-positive epithelial ovarian cancer to trastuzumab. *Biochem Biophys Res Commun* 526:685-691, 2020
36. Bizzaro F, Fuso Nerini I, Taylor MA, et al: VEGF pathway inhibition potentiates PARP inhibitor efficacy in ovarian cancer independent of BRCA status. *J Hematol Oncol* 14:186, 2021
37. Ip CKM, Ng PKS, Jeong KJ, et al: Neomorphic PDGFRA extracellular domain driver mutations are resistant to PDGFRA targeted therapies. *Nat Commun* 9:4583, 2018
38. Yang B, Li X, Fu Y, et al: MEK Inhibition Remodels the Immune Landscape of Mutant KRAS Tumors to Overcome Resistance to PARP and Immune Checkpoint Inhibitors. *Cancer Res* 81:2714-2729, 2021
39. Sun C, Fang Y, Yin J, et al: Rational combination therapy with PARP and MEK inhibitors capitalizes on therapeutic liabilities in RAS mutant cancers. *Sci Transl Med* 9, 2017
40. Sun C, Yin J, Fang Y, et al: BRD4 Inhibition Is Synthetic Lethal with PARP Inhibitors through the Induction of Homologous Recombination Deficiency. *Cancer Cell* 33:401-416 e8, 2018
41. Ray-Coquard I, Vanacker H, Le Saux O, et al: Overcoming resistance to PARP inhibitor in epithelial ovarian cancer, are we ready? *EBioMedicine* 61:103046, 2020
42. Zhu Z, Mu Y, Qi C, et al: CYP1B1 enhances the resistance of epithelial ovarian cancer cells to paclitaxel in vivo and in vitro. *Int J Mol Med* 35:340-8, 2015
43. Sakuma S, Raices M, Borlido J, et al: Inhibition of Nuclear Pore Complex Formation Selectively Induces Cancer Cell Death. *Cancer Discov* 11:176-193, 2021
44. Izquierdo MA, Neeffjes JJ, Mathari AE, et al: Overexpression of the ABC transporter TAP in multidrug-resistant human cancer cell lines. *Br J Cancer* 74:1961-7, 1996
45. Hasanovic A, Mus-Veteau I: Targeting the Multidrug Transporter Pth1 Potentiates Chemotherapy Efficiency. *Cells* 7, 2018

**Fig. S1. Analysis of ctDNA in matched samples. A** Mutational profile grouped by time point for patients with matched samples. **B** Changes in TMB based on pre-PARPi and post-progression ctDNA. **C** Frequency of acquired resistance mechanisms stratified by PARPi duration.

**A**

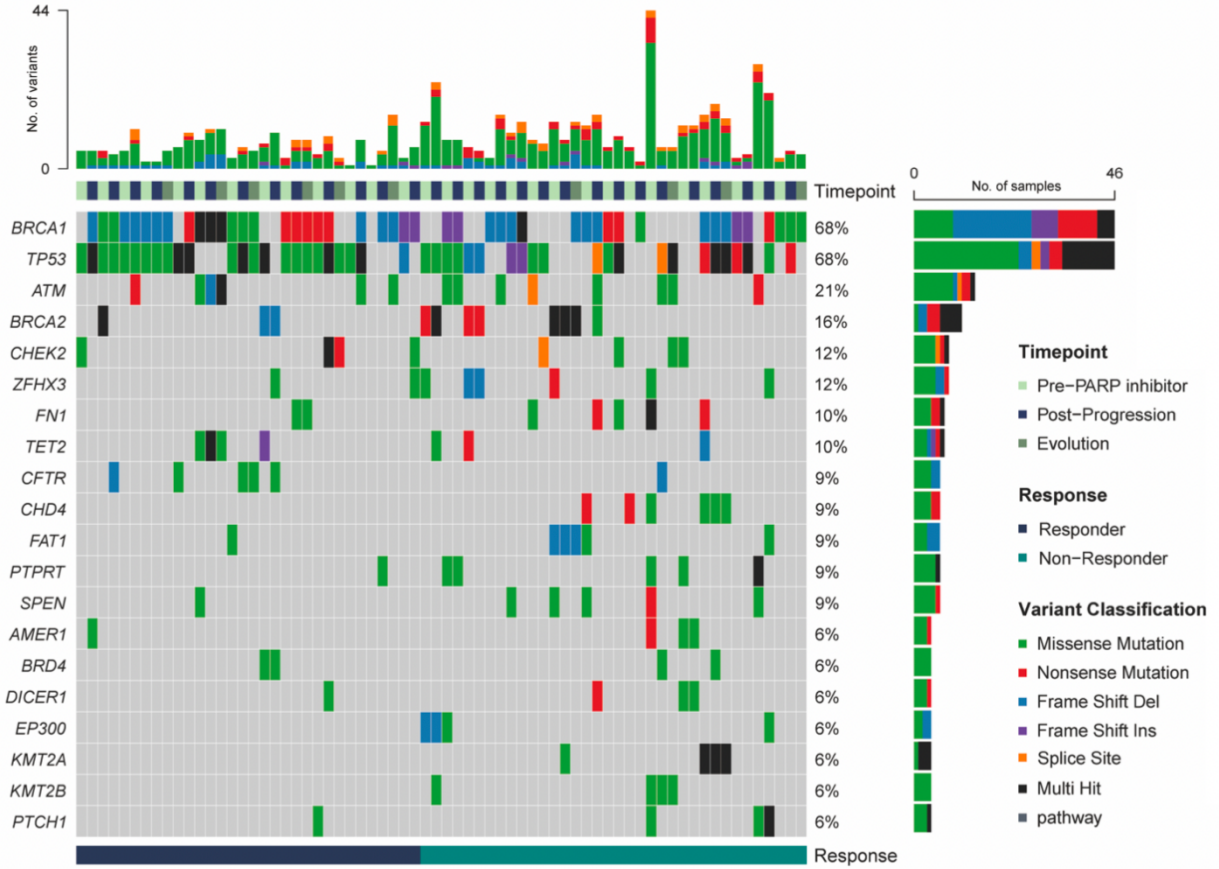

**B**

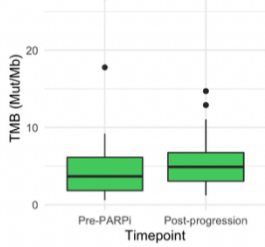

**C**

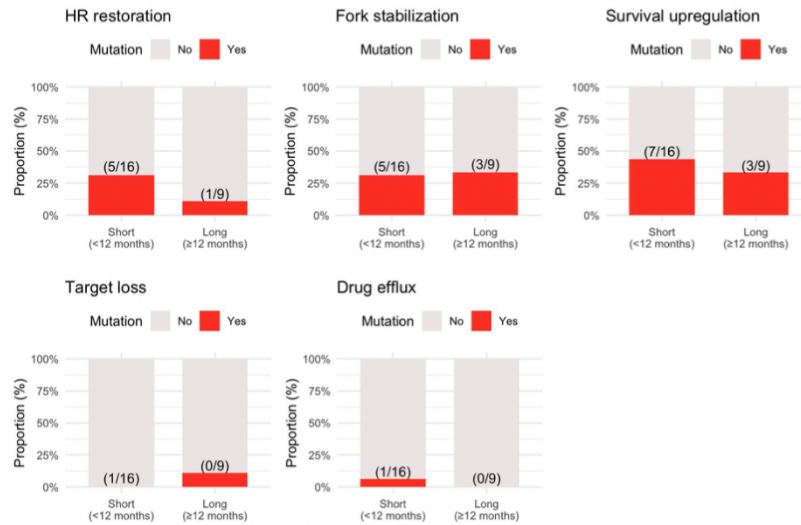

**Fig. S2. BRCA** reversion mutation identified in 3 patients.

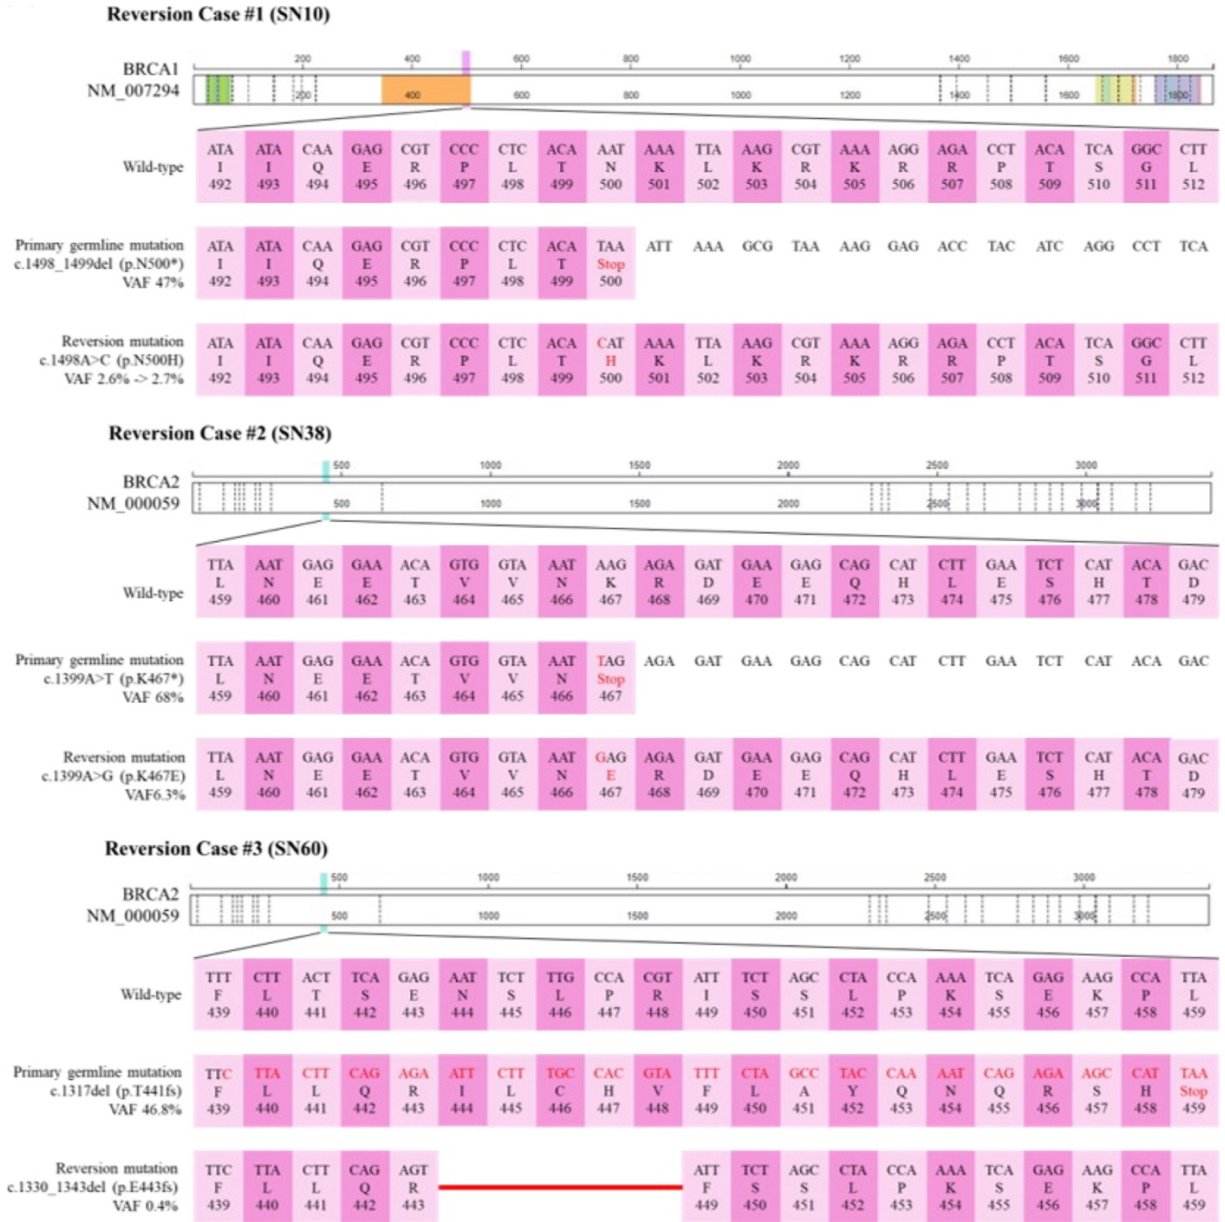





**Fig. S4. Copy number alteration based on ctDNA. PIK3CA amplification based on **A** pre-PARPi and **B** post-PARPi ctDNA**

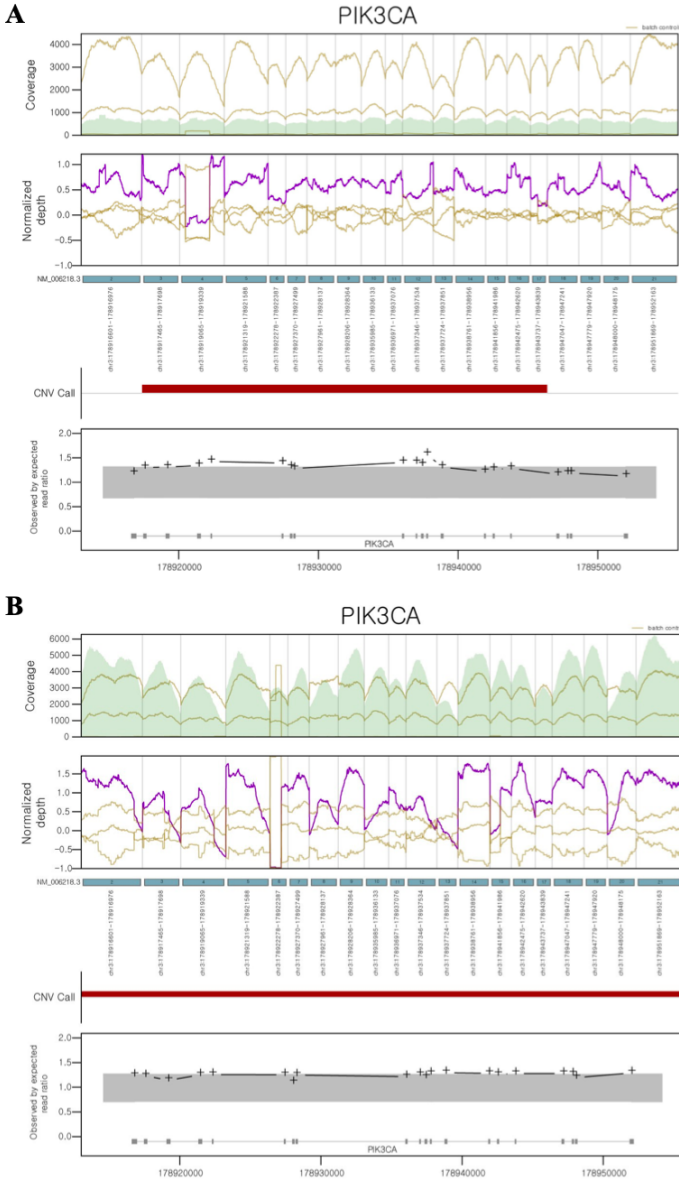

**Fig. S5. Response to subsequent platinum-based therapy for each resistance mechanism.**

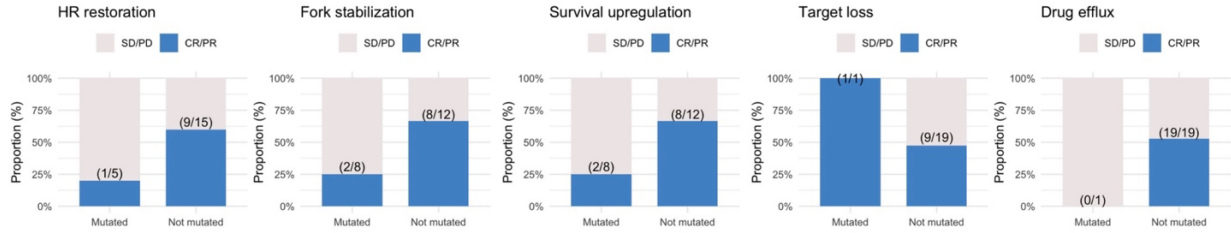



**Table S1. Demographics**

| <b>Variables</b>                | <b>Patients (n=54)</b> |
|---------------------------------|------------------------|
| Age (median, range)             | 55 (43 – 79)           |
| Histology (n, %)                |                        |
| Serous                          | 52 (96.3%)             |
| Mixed (serous and endometrioid) | 2 (3.7%)               |
| FIGO stage (n, %)               |                        |
| I                               | 4 (7.4%)               |
| II                              | 1 (1.9%)               |
| III                             | 22 (40.7%)             |
| IV                              | 27 (50.0%)             |
| BRCA (n, %)                     |                        |
| germline                        | 39 (72.2%)             |
| somatic                         | 15 (27.8%)             |
| PARP inhibitor type (n, %)      |                        |
| Olaparib                        | 39 (72.2%)             |
| Niraparib                       | 15 (27.8%)             |
| PARP inhibitor setting (n, %)   |                        |
| Maintenance                     | 44 (81.5%)             |
| Salvage                         | 10 (18.5%)             |

**Table S2. Post-specific resistance mechanisms, including genes assessed and the proportion of patients with post-specific alterations.**

|                | <b>Resistant mechanism based on post-specific mutation</b> | <b>Gene mutations identified in TMB500 panel</b>                                                                                                                                   | <b>Proportion of patients involved</b> |
|----------------|------------------------------------------------------------|------------------------------------------------------------------------------------------------------------------------------------------------------------------------------------|----------------------------------------|
| HR dependent   | BRCA reversion                                             |                                                                                                                                                                                    | 3.4% (1 out of 29)                     |
|                | Non-BRCA reversion                                         |                                                                                                                                                                                    | None                                   |
|                | BRCA independent HR restoration                            | -TP53BP1, C11orf30 (EMSY), KMT2C, KMT2A, SLX4, CTCF, SMC3                                                                                                                          | 28% (8 out of 29)                      |
| HR independent | Replication fork stabilization                             | SUZ12, MRE11, BLM, CHD4, ZFH3, TET2, MED12, MUC1, SMARCA4, EPHA7, ATRX, WRN                                                                                                        | 34% (10 out of 29)                     |
|                | Upregulation of pro-survival pathway                       | -PI3K-AKT-mTOR: PIK3CA, PIK3CB, PIK3C2B, PIK3C2G, PIK3CD, PIK3R1, MTOR, RXRA, SETD2, PTPRS<br>-WNT: IRF2, AXIN1, TCF7L2, AMER1, PDGFRB, PDGFRA<br>-Oncogene: KRAS,, RET, MET, BRD4 | 41% (12 out of 29)                     |
|                | Loss of target                                             | PARP1                                                                                                                                                                              | 7% (2 out of 29)                       |
|                | Increased drug efflux                                      | CYP1B1, NUP93, TAP2, PTCH1                                                                                                                                                         | 3% (1 out of 29)                       |
|                |                                                            |                                                                                                                                                                                    |                                        |
